# Supplementary material for: Complete kinetic and photochemical characterization of the multi-step photochromic reaction of donor–acceptor Stenhouse adducts
Source: Royal Society of Chemistry journal article supplement (doi:10.1039/d4cp02267j), 2024-10-04
Supplement: d4cp02267j1.pdf [file d4cp02267j1.pdf]

## SUPPORTING INFORMATION

### Complete kinetic and photochemical characterization of the multi-step photochromic reaction of DASA

Julien Mallétoit, Aurélie Djian, Keitaro Nakatani, Juan Xie, Rémi Métivier, Guillaume Laurent

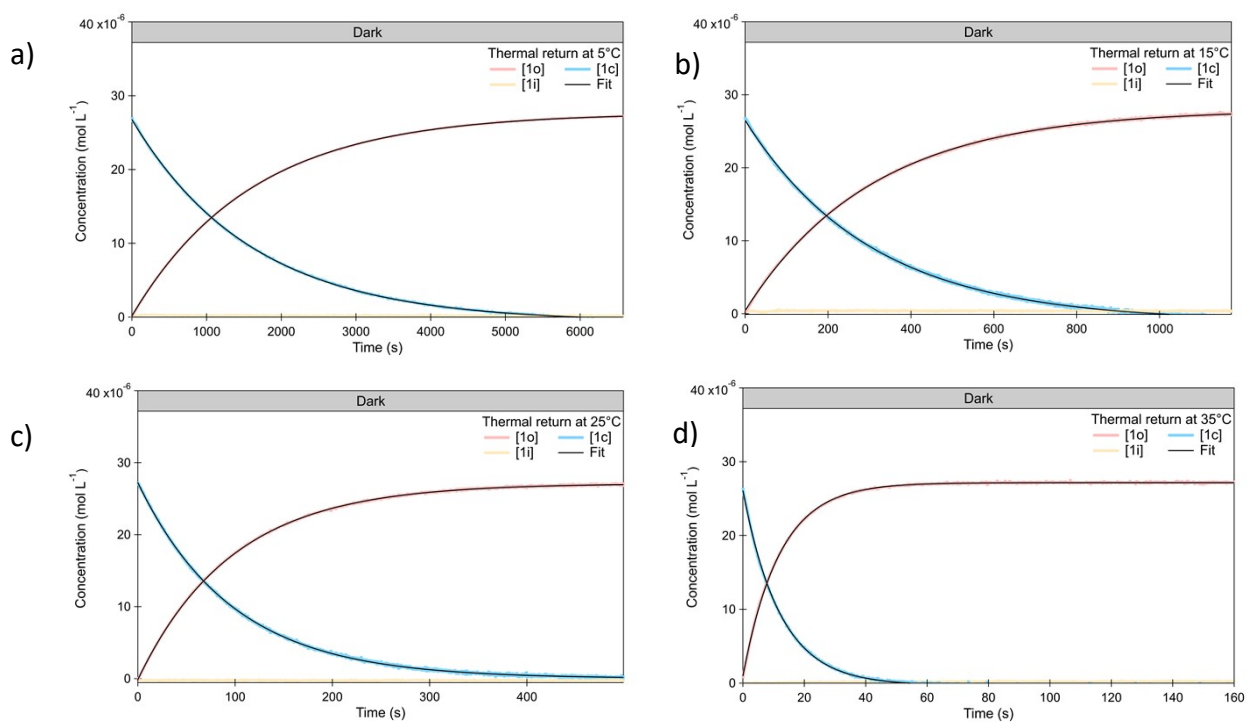

**Figure S1.** Concentration profiles of isomers **1o**, **1i** and **1c** during irradiation and thermal-back reactions, obtained at different temperature a) 5°C, b) 15°C, c) 25°C and d) 35°C. Irradiation is set at 575 nm for 26 mW power.

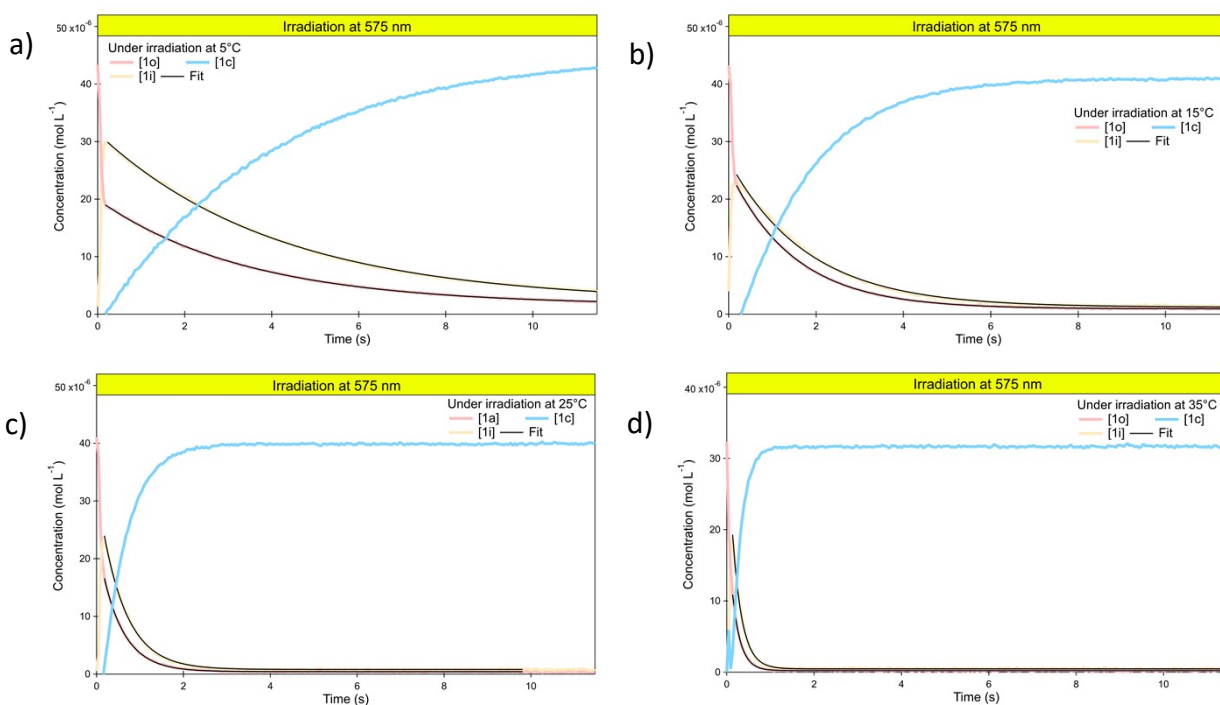

**Figure S2.** Concentration profiles of isomers **1o**, **1i** and **1c** during the first 10 sec of irradiation, obtained at different temperature a) 5°C, b) 15°C, c) 25°C and d) 35°C. Irradiation is set at 575 nm for 26 mW power.

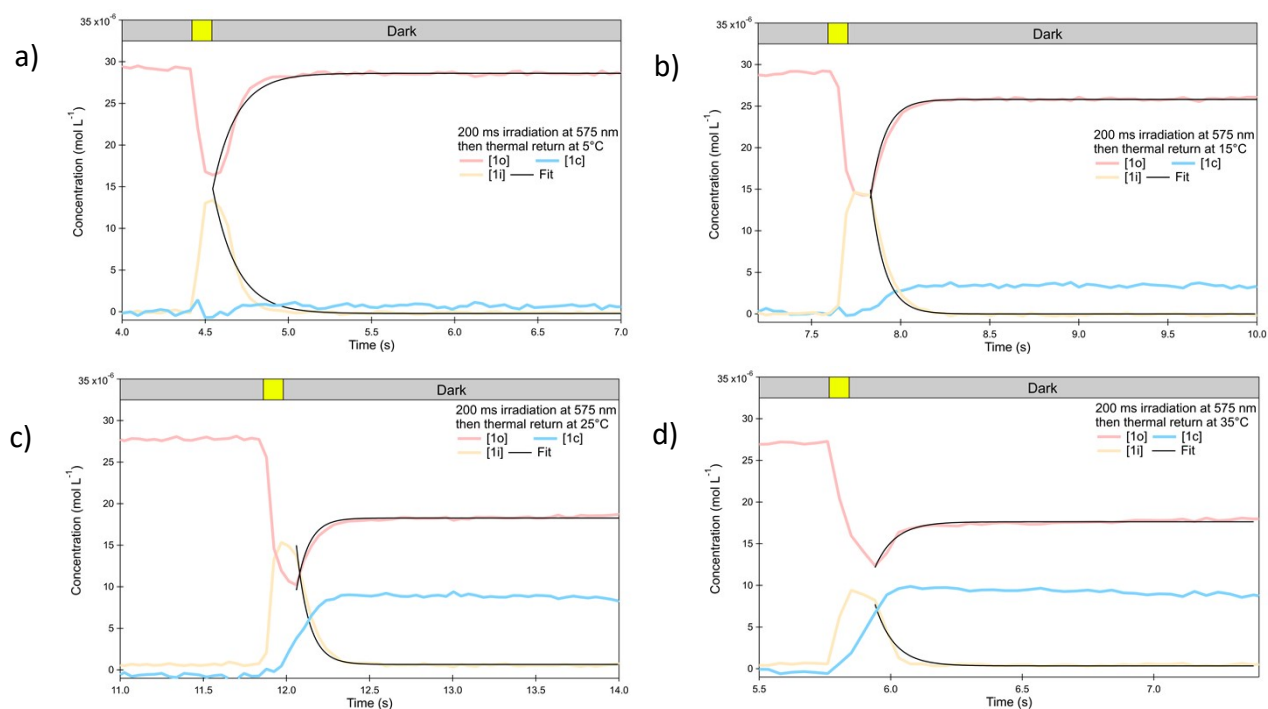

**Figure S3.** Concentration profiles of isomers **1o**, **1i** and **1c** after a short pulse of 200 ms of irradiation, obtained at different temperature a) 5°C, b) 15°C, c) 25°C and d) 35°C. Irradiation is set at 575 nm for 26 mW power.

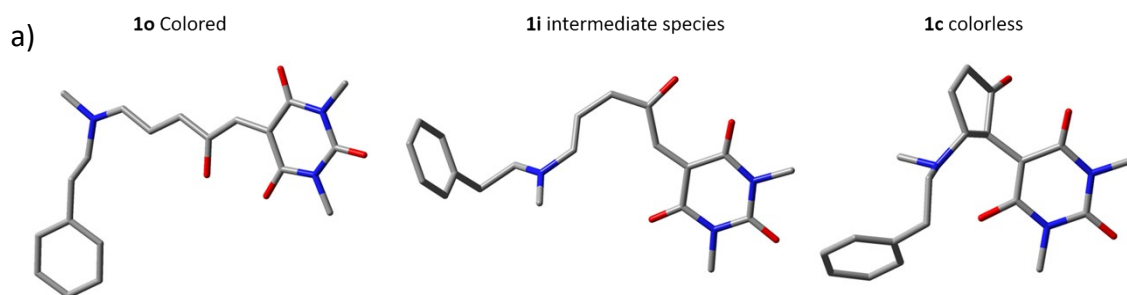

**Figure S4.** a) Calculated geometry of the **1o**, **1i** and **1c** forms and b) the calculated absorption spectra and oscillator strength for the three isomers obtained by DFT and TD-DFT calculations with the hybrid functional M06-2X and the base 6-31G+(d,p).

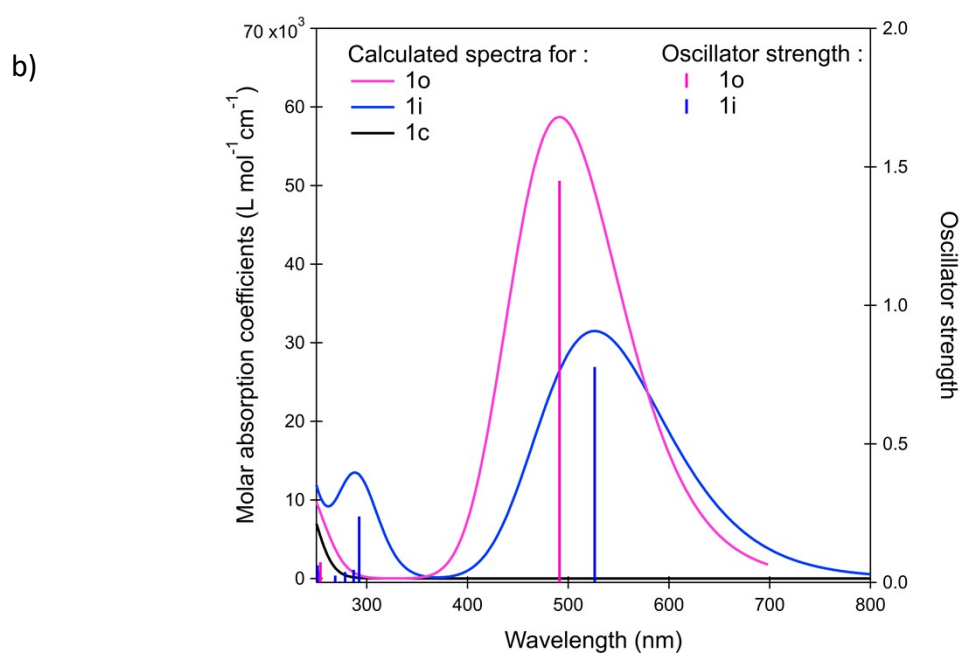

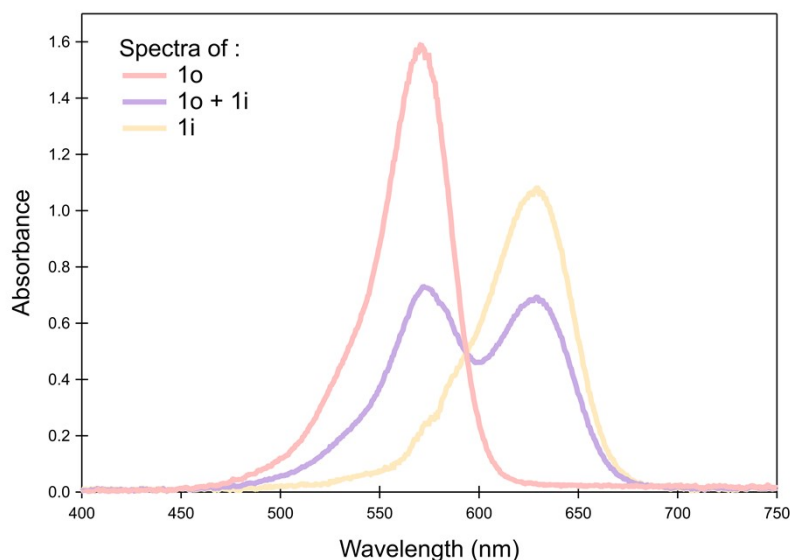

**Figure S5.** Absorption spectra of the isomers **1o** (before irradiation), a mixture of **1o** and **1i** (after irradiation), and the isomer **1i** (obtained by deconvolution, see below) of the DASA molecule in toluene at  $4,5 \times 10^{-5} \text{ mol L}^{-1}$ .

The spectra of **1o** and the mixture of **1o+1i**, and their corresponding concentrations, were obtained from the data shown in Figure S2a, at two different experimental time:  $t_0$  which corresponds to the beginning of the experiment before irradiation and  $t_{\text{mix}}$  which corresponds to the experimental time right after the beginning of the irradiation ( $t_{\text{mix}}=180 \text{ ms}$ ) where the **1i** species reaches its maximum molar fraction (before its decreasing). The following equations can then be defined to deduce the absorption spectrum of **1i**:

**At  $t_0$**

$$C_{\text{total}} = C_{1o}(t_0) + C_{1i}(t_0) + C_{1c}(t_0) \quad \text{eq. S1}$$

Assuming that all molecules are in the **1o** isomer state at the beginning of the experiment:

$$\text{Abs}(t_0) = \text{Abs}_{1o} = \epsilon_{1o} * C_{\text{total}} * l \quad \text{eq. S2}$$

**At  $t_{\text{mix}}$**

$$C_{\text{total}} = C_{1o}(t_{\text{mix}}) + C_{1i}(t_{\text{mix}}) + C_{1c}(t_{\text{mix}})$$

$$\text{Abs}(t_{\text{mix}}) = \epsilon_{1o} * C_{1o}(t_{\text{mix}}) * l + \epsilon_{1i} * C_{1i}(t_{\text{mix}}) * l + \epsilon_{1c} * C_{1c}(t_{\text{mix}}) * l$$

Since  $\epsilon_{1c} = 0$  in the visible range, it can be simplified:

$$\text{Abs}(t_{\text{mix}}) = \epsilon_{1o} * C_{1o}(t_{\text{mix}}) * l + \epsilon_{1i} * C_{1i}(t_{\text{mix}}) * l \quad \text{eq. S3}$$

Combining eq. S2 and S3:

$$\text{Abs}(t_{\text{mix}}) = \text{Abs}(t_0) * (C_{1o}(t_{\text{mix}})/C_{\text{total}}) + \epsilon_{1i} * C_{1i}(t_{\text{mix}}) * l \quad \text{eq. S4}$$

Thus,  $\text{Abs}_{1i}$  spectrum can be obtained from the two other experimental spectra, using the equation:

$$\text{Abs}_{1i} = \epsilon_{1i} * C_{1i}(t_{\text{mix}}) * l = \text{Abs}(t_{\text{mix}}) - \text{Abs}(t_0) * (C_{1o}(t_{\text{mix}})/C_{\text{total}}) \quad \text{eq. S5}$$

**Precision concerning the errors about the photophysical constants:**

For the kinetic constants  $k_{nm}$  and the activation energy  $E_{nm}$ , the error values have been obtained by the exponential and linear numerical fitting of experimental values, performed on the Igor Pro software (Wavemetrics).

Concerning the photochromic quantum yields  $\Phi_{nm}$ , the errors have been estimated considering different experimental errors on the irradiation power measurements, the kinetic constants obtained previously, and the molar absorption coefficients obtained by the Beer-Lambert law (for **1o**) or oscillator strengths ratio (for **1i**).
